# Supplementary material for: Impact of Cigarette Filter Ventilation on U.S. Smokers' Perceptions and Biomarkers of Exposure and Potential Harm
Source: Oxford University Press journal article supplement (doi:10.1158/1055-9965.epi-20-0852), 2020-10-22
Supplement: 10559965epi200852-sup-244573_2_supp_6586332_qgv8lq.docx [file 10559965epi200852-sup-244573_2_supp_6586332_qgv8lq.docx]

| **Supplementary Table 1.** Sensitivity analyses removing menthol from modeling**.** Geometric means and 95% confidence intervals of biomarkers of exposure and potential harm by cigarette filter ventilation quartile or odds ratios and 95% confidence intervals of perceiving own brand as less harmful than other brands among daily cigarette smokers in Wave 1 Population Assessment of Tobacco Use and Health (PATH) Study | | | | | | |
| --- | --- | --- | --- | --- | --- | --- |
|  | **Filter ventilation Q1** | **Filter ventilation Q2** | **Filter ventilation Q3** | **Filter ventilation Q4** |  | ***p-value*** |
| ***Biomarkers of Exposure (BOE)*** *(N=1,503)* | | | | | | |
| TNE (nmol/mg)b | 58.33 (51.85, 65.61) | 57.37 (50.50, 65.19) | 57.05 (50.62, 64.30) | 58.77 (53.86, 64.13) |  | 0.9729 |
| Total NNAL (pmol/mg)b | 1.24 (1.08, 1.41) | 1.26 (1.09, 1.45) | 1.19 (1.04, 1.35) | 1.13 (0.99, 1.30) |  | 0.6806 |
| Total NNN (pmol/mg)b | 0.073 (0.062, 0.087) | 0.061 (0.053, 0.070) | 0.074 (0.064, 0.086) | 0.063 (0.054, 0.074) |  | 0.1639 |
| 3-HPMA (nmol/mg)b | 5.51 (5.00, 6.08) | 4.94 (4.43, 5.51) | 5.17 (4.73, 5.66) | 5.68 (5.19, 6.22) |  | 0.1811 |
| 2-HPMA (nmol/mg)b | 0.32 (0.29, 0.37) | 0.31 (0.27, 0.36) | 0.31 (0.28, 0.34) | 0.35 (0.30, 0.41) |  | 0.4150 |
| HMPMA (nmol/mg)b | 10.02 (9.07, 11.07) | 9.94 (9.03, 10.94) | 10.13 (9.24, 11.10) | 10.73 (9.84, 11.70) |  | 0.5741 |
| PHMA (pmol/mg)b | 3.45 (3.08, 3.86) | 3.73 (3.24, 4.29) | 4.51 (3.98, 5.10)* | 4.18 (3.80, 4.60)* |  | **0.0012** |
| 2CYEMA (nmol/mg)b | 0.80 (0.71, 0.90) | 0.73 (0.65, 0.82) | 0.72 (0.63, 0.82) | 0.83 (0.74, 0.93) |  | 0.2483 |
| 1-HOP (pmol/mg)b | 1.46 (1.31, 1.62) | 1.43 (1.27, 1.60) | 1.48 (1.35, 1.62) | 1.53 (1.37, 1.71) |  | 0.8714 |
| ***Biomarkers of Potential Harm (BOPH)*** *(N=948)* | | | | | | |
| 8-*iso*-PGF2α (pg/mg)b | 583.82 (528.53, 644.90) | 546.15 (494.97, 602.63) | 567.36 (525.68, 612.35) | 573.58 (525.37, 626.22) |  | 0.7757 |
| ICAM-1 (ng/ml)b | 244.33 (192.39, 310.29) | 255.34 (230.28, 283.13) | 267.47 (223.61, 263.54) | 242.77 (223.61, 263.54) |  | 0.4821 |
| IL6 (pg/ml)b | 1.56 (1.37, 1.76) | 1.72 (1.48, 1.99) | 1.66 (1.44, 1.91) | 1.58 (1.40, 1.78) |  | 0.6939 |
| hsCRP (mg/L)b | 2.14 (1.69, 2.71) | 1.76 (1.39, 2.24) | 1.79 (1.43, 2.26) | 1.35 (1.09, 1.66)* |  | **0.0275** |
| Fibro (mg/L)b | 347.72 (331.39, 364.82) | 343.74 (318.46, 371.04) | 322.37 (304.87, 340.84) | 315.58 (297.05, 335.22) |  | 0.0760 |
| ***Harm Perception*** (N=1503) | | | | | | |
| Less harmful than other brandsb | Reference | 37.25 (5.56, 249.32) | 15.09 (3.66, 62.14) | 24.73 (4.85, 126.13) |  | **0.0016** |
|  | **Filter ventilation Q1** | **Filter ventilation Q2-Q4** |  |  |  |  |
| Less harmful than other brandsb | Reference | 21.74 (4.76, 99.16) |  |  |  | **0.0001** |
| b Adjusted for age, sex, race, education, smoking duration and quit effort (no menthol in model)  *indicates statistically significance difference from Q1 when accounting for multiple comparisons | | | | | | |
