# Supplementary material for: Impact of Cigarette Filter Ventilation on U.S. Smokers' Perceptions and Biomarkers of Exposure and Potential Harm
Source: Oxford University Press journal article supplement (doi:10.1158/1055-9965.epi-20-0852), 2020-10-22
Supplement: 10559965epi200852-sup-244573_2_supp_6586336_qgv8lq.docx [file 10559965epi200852-sup-244573_2_supp_6586336_qgv8lq.docx]

| **Supplementary Table 2.** Test of model effects for TNE | | | |  |
| --- | --- | --- | --- | --- |
| Adjusted for age, sex, race, and education | | Further adjusted for smoking duration, quit effort, and menthol | | Removal of menthol |
| **Model effect** | ***P-value*** | **Model** | ***P-value*** | **Model effect** | ***P-value*** |
| Filter Ventilation Quartile | 0.9617 | Filter Ventilation Quartile | 0.9730 | Filter Ventilation Quartile | 0.9729 |
| Age | <.0001 | Age | 0.8630 | Age | 0.8657 |
| Sex | <.0001 | Sex | <.0001 | Sex | <.0001 |
| Race | <.0001 | Race | <.0001 | Race | <.0001 |
| Education | 0.6844 | Education | 0.9225 | Education | 0.9237 |
|  |  | Quit effort | 0.0007 | Quit effort | 0.0008 |
|  |  | Smoking duration | 0.0003 | Smoking duration | 0.0002 |
|  |  | Menthol | 0.8785 |  |  |
