# Supplementary material for: Impact of Cigarette Filter Ventilation on U.S. Smokers' Perceptions and Biomarkers of Exposure and Potential Harm
Source: Oxford University Press journal article supplement (doi:10.1158/1055-9965.epi-20-0852), 2020-10-22
Supplement: 10559965epi200852-sup-244573_2_supp_6586341_qgv8lr.docx [file 10559965epi200852-sup-244573_2_supp_6586341_qgv8lr.docx]

**Supplementary Figure 1.** Distribution of cigarette filter ventilationlevel


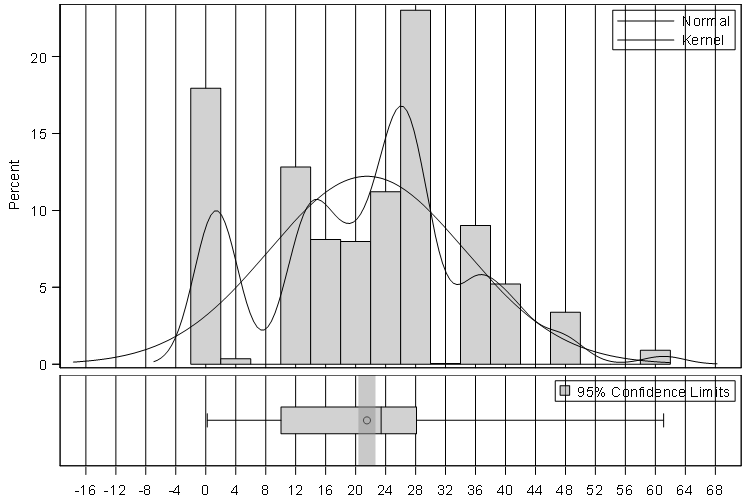


Filter Ventilation (%)

Percent of participants
